# Supplementary material
Source: publisher site journal article supplement (http://e-cmh.org/upload/media/cmh-2021-0355-suppl1.pdf)
Supplement: Supplementary file 1 [file cmh-2021-0355-suppl1.pdf]

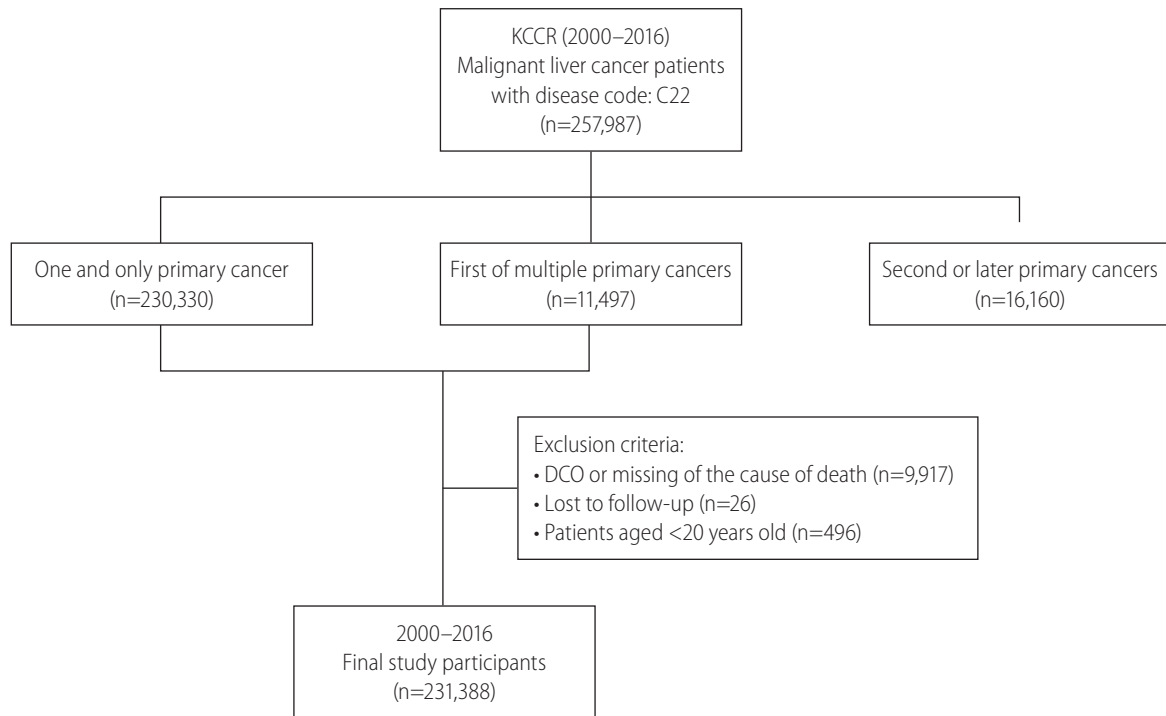

**Supplementary Figure 1.** Patient selection. KCCR, Korea central cancer registry; DCO, death certificate only.
